# Supplementary figures and images for: RETRACTED ARTICLE: KLF5 regulated lncRNA RP1 promotes the growth and metastasis of breast cancer via repressing p27kip1 translation
Source: PubMed Central journal article supplement (PMC6509113; doi:10.1038/s41419-019-1566-5), 2019-05-09

**Figure S1**

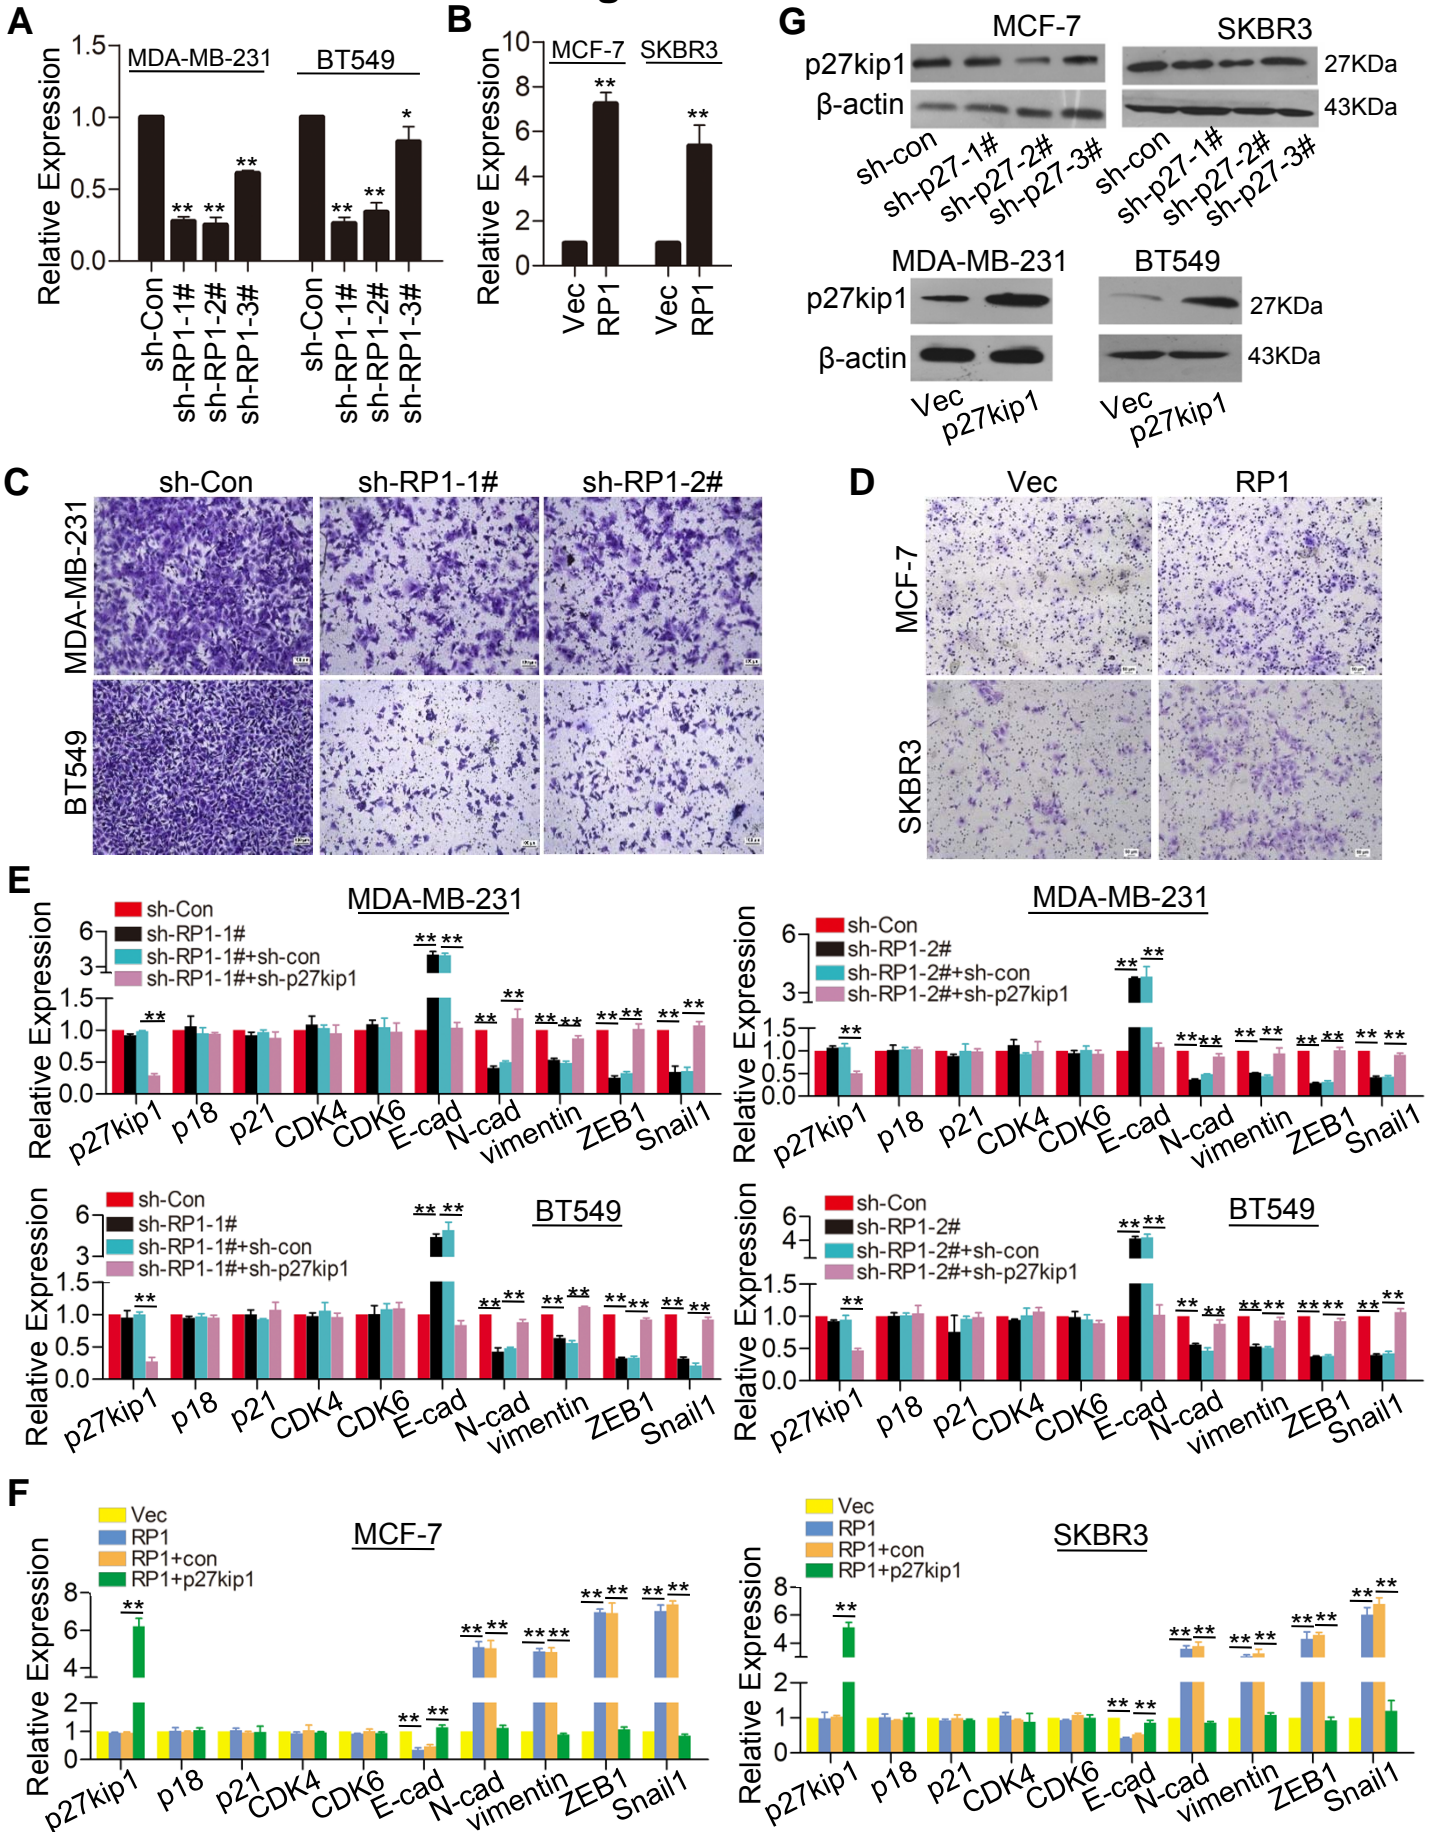

Supplement: 41419_2019_1566_MOESM3_ESM.pdf [file 41419_2019_1566_MOESM3_ESM.pdf]

**Figure S2**

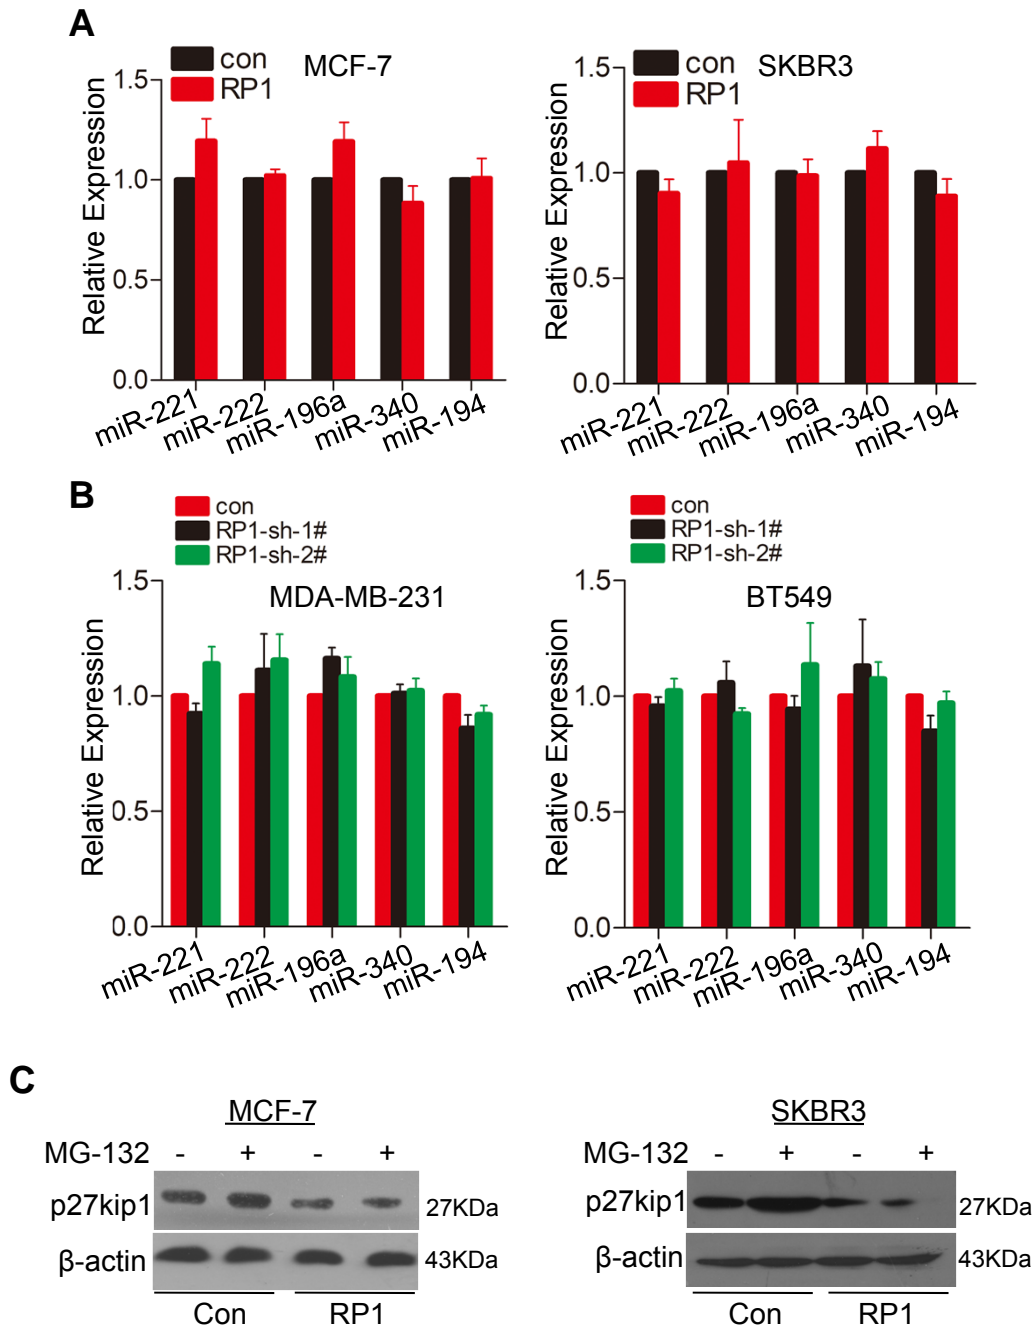

Supplement: 41419_2019_1566_MOESM4_ESM.pdf [file 41419_2019_1566_MOESM4_ESM.pdf]

**Figure S3**

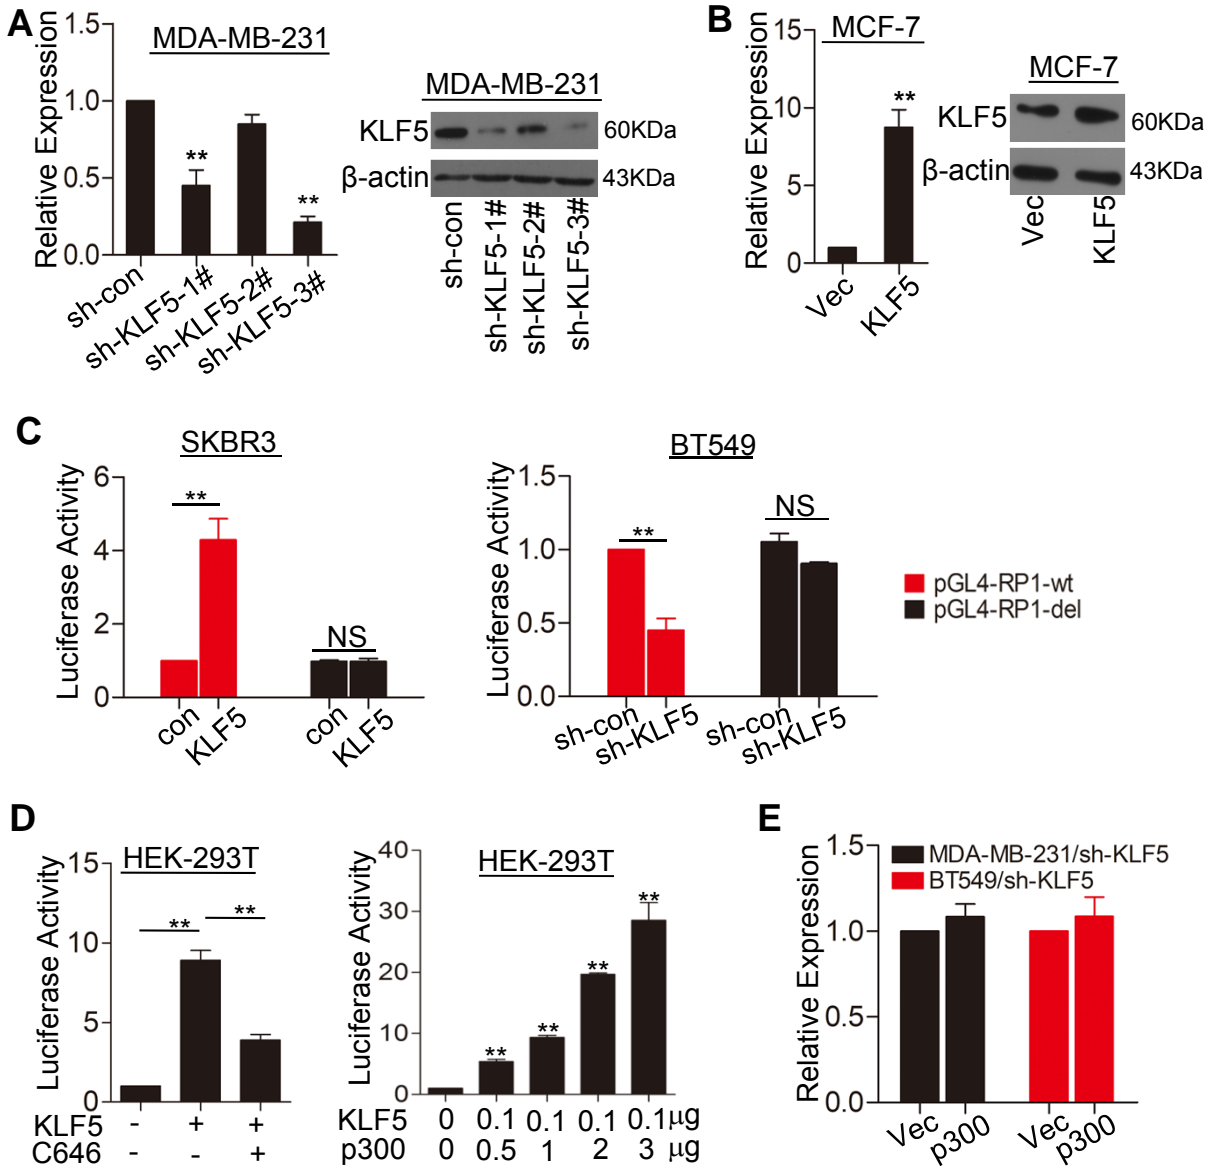

Supplement: 41419_2019_1566_MOESM5_ESM.pdf [file 41419_2019_1566_MOESM5_ESM.pdf]
